# Supplementary material for: High-Speed Fluorescence Imaging Corroborates Biological Data on the Influence of Different Nozzle Types on Cell Spray Viability and Formation
Source: MDPI journal article supplement (doi:10.3390/jfb15050126), 2024-05-14
Supplement: s1 [file s1]

Supplementary Materials

# High-Speed Fluorescence Imaging Corroborates Biological Data on the Influence of Different Nozzle Types on Cell Spray Viability and Formation

Miriam Heuer <sup>1</sup>, Mehdi Stiti <sup>2</sup>, Volker Eras <sup>1</sup>, Julia Scholz <sup>1</sup>, Norus Ahmed <sup>1,\*</sup>, Edouard Berrocal <sup>2</sup> and Jan C. Brune <sup>1</sup>

<sup>1</sup> German Institute for Cell and Tissue Replacement (DIZG, Gemeinnützige GmbH), Haus 42, Köpenicker Str. 325, 12555 Berlin, Germany; m\_heuer@dizg.de (M.H.); v\_eras@dizg.de (V.E.); j\_scholz@dizg.de (J.S.); j\_brune@dizg.de (J.C.B.)

<sup>2</sup> Division of Combustion Physics, Department of Physics, Lund University, P.O. Box 118, 22100 Lund, Sweden; mehdi.stiti@imft.fr (M.S.); edouard.berrocal@fysik.lu.se (E.B.)

\* Correspondence: n\_ahmed@dizg.de

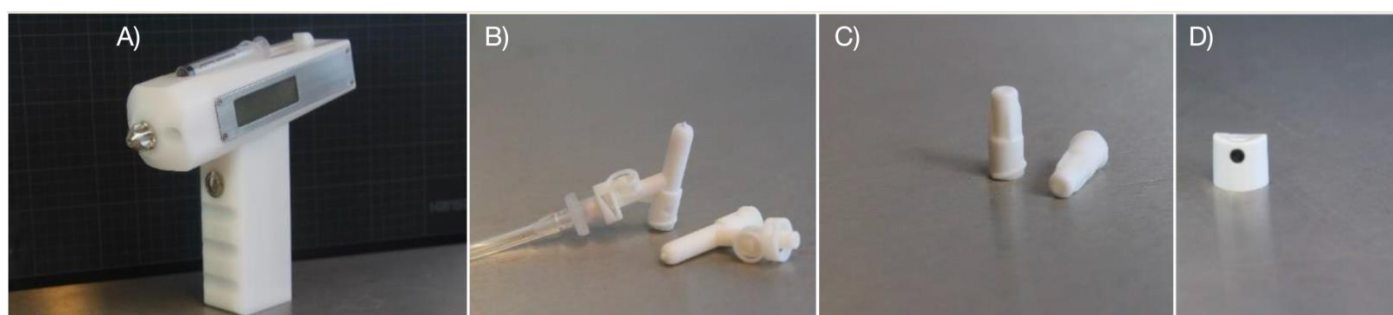

**Figure S1.** The different nozzles used. (A) DIZG Cell Spray. (B) Air-assisted nozzle, AN1. (C) Unassisted nozzle, AN2. (D) Unassisted nozzle, AN3.

**Citation:** Heuer, M.; Stiti, M.; Eras, V.; Scholz, J.; Ahmed, N.; Berrocal, E.; Brune, J.C. High-Speed Fluorescence Imaging Corroborates Biological Data on the Influence of Different Nozzle Types on Cell Spray Viability and Formation. *J. Funct. Biomater.* **2024**, *15*, 126. <https://doi.org/10.3390/jfb15050126>

Academic Editor: Chunming Wang

Received: 4 April 2024

Revised: 29 April 2024

Accepted: 09 May 2024

Published: 24 May 2024

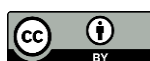

**Copyright:** © 2024 by the authors. Licensee MDPI, Basel, Switzerland. This article is an open access article distributed under the terms and conditions of the Creative Commons Attribution (CC BY) license (<https://creativecommons.org/licenses/by/4.0/>).

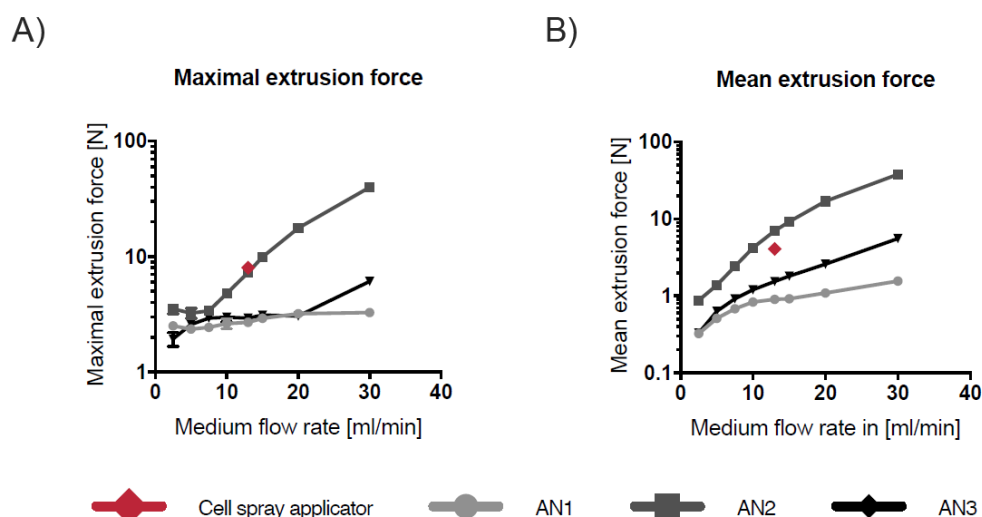

**Figure S2.** (A) Maximum extrusion force of the different nozzles using a variety of medium flow rates. (B) Mean extrusion force for the different nozzle types using a variety of medium flow rates. Data are all displayed as mean value  $\pm$  SD for  $n = 3$  replicates.

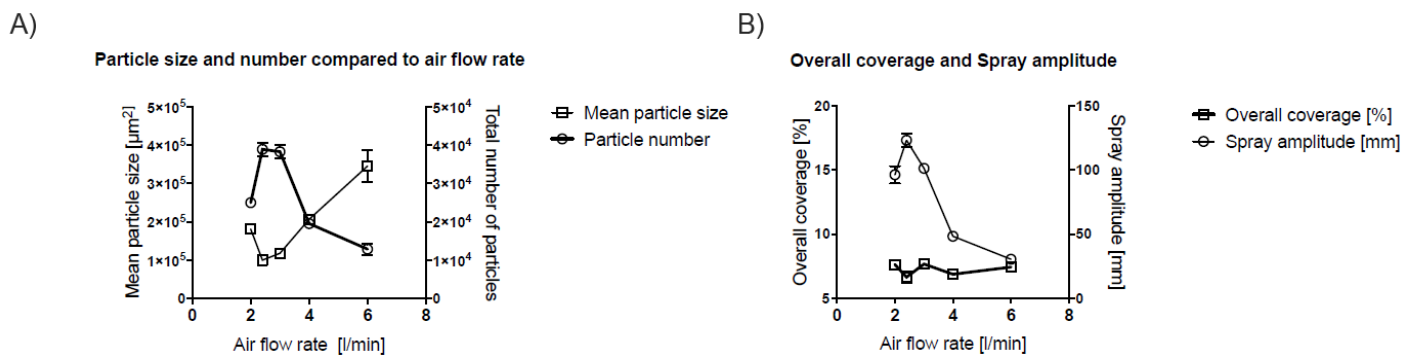

**Figure S3.** Varied airflow testing of AN1. **(A)** Size and Number of particles achieved by AN1 using a fixed medium flow rate of 13 mL/min and a variety of airflow rates. **(B)** Spray amplitude and overall coverage using AN1. A constant medium flow rate of 13 mL/min and a variety of airflow rates are used. Data are all displayed as mean value + SD for  $n = 3$  replicates. .

**Disclaimer/Publisher's Note:** The statements, opinions and data contained in all publications are solely those of the individual author(s) and contributor(s) and not of MDPI and/or the editor(s). MDPI and/or the editor(s) disclaim responsibility for any injury to people or property resulting from any ideas, methods, instructions or products referred to in the content.
